# Supplementary material for: miR-10b-5p regulates adipocyte lineage commitment and adipogenesis via targeting of Gata6 and Tubby
Source: Research Square preprint supplement (doi:10.21203/rs.3.rs-7214378/v1), 2025-08-06
Supplement: Supplementary file 1 [file d9edba8da0fc0984dc177ec2.docx]

# Supplementary materials

# Supplementary Tables

Supplementary Table 1**. Brown Fat Differentiation Protocol**

*Induction media was administered for 2 days. Following induction, cells were treated with maintenance medium for 6 to 8 days with medium being replenished every 2 days. Components were added in complete medium that included DMEM/F12, 10%FBS, 1% L-Glutamine and 1% Penicillin-Streptomycin antibiotics.*

| **Compound** | **Induction Medium** | **Maintenance Medium** |
| --- | --- | --- |
| Insulin | 1 µg/ml | 1 µg/ml |
| 3,3′,5-Triiodo-L-thyronine sodium salt (T3) | 1 nM | 1 nM |
| IBMX | 0.5 mM |  |
| Dexamethasone | 250 nM |  |
| Indomethacin | 125 µM |  |

Supplementary Table 2**. White Fat Differentiation Protocol**

*Induction medium 1 was administered for 3 to4 days. Following induction medium 1, cells were treated with induction medium 2 for 2 to 3 days and then with maintenance medium for 2 to 3 days. Components were added in complete medium that included DMEM/F12, 10%FBS, 1% L-Glutamine and 1% Penicillin-Streptomycin antibiotics.*

| **Compound** | **Induction Medium 1** | **Induction Medium 2** | **Maintenance Medium** |
| --- | --- | --- | --- |
| Insulin | 5 mg/ml | 5 mg/ml | 5 mg/ml |
| IBMX | 0.5 mM |  |  |
| Dexamethasone | 250 nM |  |  |
| 3,3′,5-Triiodo-L-thyronine sodium salt (T3) | 0.1 nM | 0.1 nM | 0.1 nM |
| Cortisol | 100 nM |  |  |
| Transferrin | 1 mg/ml | 1 mg/ml | 1 mg/ml |
| Rosiglitazone | 5 mM | 1 mM |  |
| Biotin | 16 mM | 16 mM | 16 mM |
| Panthothenic acid | 1.8 mM | 1.8 mM | 1.8 mM |
| Ascorbic acid | 100 mM | 100 mM |  |

Supplementary Table 3**. Primer sequences for human genes.**

| **Gene name** | **Forward primer (5’ to 3’)** | **Reverse primer (5’ to 3’)** |
| --- | --- | --- |
| GATA6 | CACACCACAACTACCACCTTAT | TCCTGGTTTGAATTCCCTCTTT |
| FABP4 | AACTGGTGGTGGAATGCGT | AACTGGTGGTGGAATGCGT |
| LN19 | GCGGAAGGGTACAGCCAA | GCAGCCGGCGCAAAA |
| DLK1 | CACGGACTCTGTGGAGAACC | GCAGGCCCGAACATCTCTAT |
| UCP1 | GTGTGCCCAACTGTGCAATG | CCAGGATCCAAGTCGCAAGA |

Supplementary Table 4**. Primer sequences for mouse genes.**

| **Gene name** | **Forward primer (5’ to 3’)** | **Reverse primer (5’ to 3’)** |
| --- | --- | --- |
| BMP2 | GAACACAAGTCAGTGGGAGAG | CACCTGGGTTCTCCTCTAAATG |
| CIDEA | CACGCATTTCATGATCTTGGA | GTTGCTTGCAGACTGGGACAT |
| DAB2 | GACGCTTTCACTGGCTTAGA | CCTTCCTTGAGGGAACAAGAG |
| DLK1 | CGGGAAATTCTGCGAAATAG | TGTGCAGGAGCATTCGTACT |
| FABP4 | ACACCAGATTTCCTTAAACTG | CCATCTAGGGTTATGATGCTCTTCA |
| GATA4 | GGAAGCCCAAGAACCTGAATA | CTAGTGGCATTGCTGGAGTTA |
| GATA6 | GCCTTGTCTGCTAAGGAAGAT | GGATGAATGGGTTCTGGGATAA |
| KLF4 | GTGCCCCGACTAACCGTTG | GTCGTTGAACTCCTCGGTCT |
| LN19 | GAGCACATCCACAAGCTGAA | TTTCGTGCTTCCTTGGTCTT |
| NANOG | GCCTCCAGCAGATGCAAG | GGTTTTGAAACCAGGTCTTAACC |
| OCT4 | CGTGGAGACTTTGCAGCCTG | GCTTGGCAAACTGTTCTAGCTCCT |
| SOX7 | TCACCTCCCCCATCTACCAG | GGCCAAGGGCTAAAGAACCT |
| TUB | ACAATGGCGTCAACCCTCAG | CTGGGACGATCACACTCATCTTC |
| UCP1 | TACCCAAGCGTACCAAGCTG | ACCCGAGTCGCAGAAAAGAA |

Supplementary Table 5**. Primer sequences for Luciferase and mutagenesis assays.**

| **Gene name** | **Forward primer (5’ to 3’)** | **Reverse primer (5’ to 3’)** |
| --- | --- | --- |
| Gata6 3’UTR | GCTGGTGCTACCAAGAGGC | GGTTGGTCACGTGGTACAGG |
| Tub 3’UTR | GTTTCTAGAGGGCAGTAGGAC | GCCTGTCCTCACCAAGCTG |
| Gata6 3’UTR mutagenesis | AGAAAAATATCTTGTTTGCTACCAGATTTACAAATTCCAAGTGACCTCAGATCAGCC | GGCTGATCTGAGGTCACTTGGAATTTGTAAATCTGGTAGCAAACAAGATATTTTTCT |
| Tub 3’UTR mutagenesis | TAGAGATGACTGCTTAGCTAGGAAGCTCTGCTCTG | CAGAGCAGAGCTTCCTAGCTAAGCAGTCATCTCTA |

Supplementary Table 6**. CRISPR/Cas9 sgRNA sequences without the NGG end and primers used for HRMA.**

| **Sequence name** | **Forward sequence (5’ to 3’)** | **Reverse sequence (5’ to 3’)** |
| --- | --- | --- |
| miR-10b-5p sgRNA | CCTGTAGAACCGAATTTGTG | CACAAATTCGGTTCTACAGG |
| Non-Targeted Control sgRNA | GGGTCTTCGAGAAGACCT | AGGTCTTCTCGAAGACCC |
| HRMA primers | CCGAGGTTGTAACGTTGTC | CCATGTCGGAGATATATGAAG |

Supplementary Table 7**. Oligonucleotide sequences of miRNA inhibitors and mimics.**

| **name** | **Catalogue number** | **Inhibitor sequence** |
| --- | --- | --- |
| mmu-miR-10b-5p  miRCURY LNA miRNA Inhibitor | YI04100556-DDA | ACAAATTCGGTTCTACAGGGT |
| miRCURY LNA miRNA Inhibitor Control | YI00199006 | TAACACGTCTATACGCCCA |
| **name** | **Catalogue number** | **Mature miRNA sequence​** |
| hsa-miR-10b-5p  miRCURY LNA miRNA Mimic | YM00472145 | UACCCUGUAGAACCGAAUUUGUG |
| Negative Control  miRCURY LNA miRNA Mimic | YM00479902 | UCACCGGGUGUAAAUCAGCUUG |

Supplementary Table 8**. On/off target sites of sgRNA miR-10b generated by CCTop - CRISPR/Cas9 target online predictor.** (web tool accessed at 17:32pm, 07/12/23)

| Coordinates | MM | target_seq | PAM | position | gene name | gene id |
| --- | --- | --- | --- | --- | --- | --- |
| [chr2:74726077-74726099](http://genome.ucsc.edu/cgi-bin/hgTracks?db=mm10&position=chr2:74726077-74726099) | 0 | CCTGTAGA[ACCGAATTTGTG] | TGG | Exonic | Mir10b | [ENSMUSG00000065500](http://metazoa.ensembl.org/mus_musculus/Gene/Summary?g=ENSMUSG00000065500) |
| [chr2:105460157-105460179](http://genome.ucsc.edu/cgi-bin/hgTracks?db=mm10&position=chr2:105460157-105460179) | 4 | **TA**TGT**G**GA[A**A**CGAATTTGTG] | AGG | Intergenic | 4930527A07Rik | [ENSMUSG00000086764](http://metazoa.ensembl.org/mus_musculus/Gene/Summary?g=ENSMUSG00000086764) |
| [chr15:59583720-59583742](http://genome.ucsc.edu/cgi-bin/hgTracks?db=mm10&position=chr15:59583720-59583742) | 4 | **AT**TG**G**AGA[AC**T**GAATTTGTG] | TGG | Intronic | Nsmce2 | [ENSMUSG00000059586](http://metazoa.ensembl.org/mus_musculus/Gene/Summary?g=ENSMUSG00000059586) |
| [chr5:109894569-109894591](http://genome.ucsc.edu/cgi-bin/hgTracks?db=mm10&position=chr5:109894569-109894591) | 4 | **T**CT**T**TA**A**A[AC**G**GAATTTGTG] | GGG | Intergenic | Gm26779 | [ENSMUSG00000097140](http://metazoa.ensembl.org/mus_musculus/Gene/Summary?g=ENSMUSG00000097140) |
| [chr9:41431921-41431943](http://genome.ucsc.edu/cgi-bin/hgTracks?db=mm10&position=chr9:41431921-41431943) | 4 | **G**CTG**A**A**C**A[AC**T**GAATTTGTG] | GGG | Exonic | 2610203C20Rik | [ENSMUSG00000074415](http://metazoa.ensembl.org/mus_musculus/Gene/Summary?g=ENSMUSG00000074415) |
| [chr1:58718061-58718083](http://genome.ucsc.edu/cgi-bin/hgTracks?db=mm10&position=chr1:58718061-58718083) | 4 | **G**CTG**C**AG**T**[AC**T**GAATTTGTG] | GGG | Intronic | Cflar | [ENSMUSG00000026031](http://metazoa.ensembl.org/mus_musculus/Gene/Summary?g=ENSMUSG00000026031) |
| [chr8:106690664-106690686](http://genome.ucsc.edu/cgi-bin/hgTracks?db=mm10&position=chr8:106690664-106690686) | 4 | **T**CTG**G**AG**C**[AC**A**GAATTTGTG] | TGG | Intronic | Tango6 | [ENSMUSG00000041949](http://metazoa.ensembl.org/mus_musculus/Gene/Summary?g=ENSMUSG00000041949) |
| [chr4:40339598-40339620](http://genome.ucsc.edu/cgi-bin/hgTracks?db=mm10&position=chr4:40339598-40339620) | 4 | **T**CT**A**TAGA[**G**C**T**GAATTTGTG] | AGG | Intergenic | 4930509K18Rik | [ENSMUSG00000087137](http://metazoa.ensembl.org/mus_musculus/Gene/Summary?g=ENSMUSG00000087137) |
| [chr15:72912507-72912529](http://genome.ucsc.edu/cgi-bin/hgTracks?db=mm10&position=chr15:72912507-72912529) | 4 | **AG**TGTAGA[A**G**C**T**AATTTGTG] | AGG | Intronic | Gm3150 | [ENSMUSG00000096173](http://metazoa.ensembl.org/mus_musculus/Gene/Summary?g=ENSMUSG00000096173) |
| [chr16:84708197-84708219](http://genome.ucsc.edu/cgi-bin/hgTracks?db=mm10&position=chr16:84708197-84708219) | 3 | C**T**TGTAGA[AC**TT**AATTTGTG] | TGG | Intronic | Mir155hg | [ENSMUSG00000097418](http://metazoa.ensembl.org/mus_musculus/Gene/Summary?g=ENSMUSG00000097418) |
| [chr18:40483559-40483581](http://genome.ucsc.edu/cgi-bin/hgTracks?db=mm10&position=chr18:40483559-40483581) | 4 | **A**CTGTAG**T**[**C**C**T**GAATTTGTG] | GGG | Intronic | Kctd16 | [ENSMUSG00000051401](http://metazoa.ensembl.org/mus_musculus/Gene/Summary?g=ENSMUSG00000051401) |
| [chr5:16220572-16220594](http://genome.ucsc.edu/cgi-bin/hgTracks?db=mm10&position=chr5:16220572-16220594) | 4 | CCT**TC**AGA[A**AT**GAATTTGTG] | TGG | Intronic | Cacna2d1 | [ENSMUSG00000040118](http://metazoa.ensembl.org/mus_musculus/Gene/Summary?g=ENSMUSG00000040118) |
| [chr18:29833061-29833083](http://genome.ucsc.edu/cgi-bin/hgTracks?db=mm10&position=chr18:29833061-29833083) | 4 | **T**CT**T**TAGA[A**A**C**C**AATTTGTG] | CGG | Intergenic | NA | [NA](http://metazoa.ensembl.org/mus_musculus/Gene/Summary?g=NA) |
| [chr19:42216214-42216236](http://genome.ucsc.edu/cgi-bin/hgTracks?db=mm10&position=chr19:42216214-42216236) | 4 | CCT**T**TAG**T**[A**T**C**T**AATTTGTG] | TGG | Intergenic | Sfrp5 | [ENSMUSG00000018822](http://metazoa.ensembl.org/mus_musculus/Gene/Summary?g=ENSMUSG00000018822) |
| [chr17:3969757-3969779](http://genome.ucsc.edu/cgi-bin/hgTracks?db=mm10&position=chr17:3969757-3969779) | 4 | C**A**T**T**TA**C**A[ACCGAA**A**TTGTG] | AGG | Intergenic | NA | [NA](http://metazoa.ensembl.org/mus_musculus/Gene/Summary?g=NA) |
| [chr6:36427248-36427270](http://genome.ucsc.edu/cgi-bin/hgTracks?db=mm10&position=chr6:36427248-36427270) | 4 | **A**C**A**GTAGA[AC**A**GA**T**TTTGTG] | TGG | Intronic | Mir490 | [ENSMUSG00000070075](http://metazoa.ensembl.org/mus_musculus/Gene/Summary?g=ENSMUSG00000070075) |
| [chr5:124266586-124266608](http://genome.ucsc.edu/cgi-bin/hgTracks?db=mm10&position=chr5:124266586-124266608) | 4 | C**T**T**T**TAGA[ACC**T**A**G**TTTGTG] | TGG | Intronic | Mphosph9 | [ENSMUSG00000038126](http://metazoa.ensembl.org/mus_musculus/Gene/Summary?g=ENSMUSG00000038126) |
| [chr11:107860036-107860058](http://genome.ucsc.edu/cgi-bin/hgTracks?db=mm10&position=chr11:107860036-107860058) | 4 | **T**CTG**C**AGA[A**G**CGAAT**G**TGTG] | TGG | Intergenic | Gm27595 | [ENSMUSG00000098991](http://metazoa.ensembl.org/mus_musculus/Gene/Summary?g=ENSMUSG00000098991) |
| [chr12:112107864-112107886](http://genome.ucsc.edu/cgi-bin/hgTracks?db=mm10&position=chr12:112107864-112107886) | 3 | CCTGT**T**GA[ACC**T**AATT**G**GTG] | TGG | Intronic | Aspg | [ENSMUSG00000037686](http://metazoa.ensembl.org/mus_musculus/Gene/Summary?g=ENSMUSG00000037686) |
| [chr15:3327419-3327441](http://genome.ucsc.edu/cgi-bin/hgTracks?db=mm10&position=chr15:3327419-3327441) | 4 | CCTG**A**A**C**A[AC**A**GAATTT**C**TG] | GGG | Intronic | Ghr | [ENSMUSG00000055737](http://metazoa.ensembl.org/mus_musculus/Gene/Summary?g=ENSMUSG00000055737) |

Supplementary Table 9**. Study design of the transcriptomic analysis performed on mESCs differentiation to mature adipocytes.**

| **Day 0** | | **Day 12** | | **Day 27** | |
| --- | --- | --- | --- | --- | --- |
| **Clone** | **Number of samples** | **Clone** | **Number of samples** | **Clone** | **Number of samples** |
| NCT Clone 1 | 3 | NCT Clone 1 | 1 | NCT Clone 1 | 3 |
| NCT Clone 2 | 1 | NCT Clone 2 | 2 | NCT Clone 2 |  |
| NCT Clone 3 | 1 | NCT Clone 3 | 2 | NCT Clone 3 | 1 |
| 1F10 | 3 | 1F10 | 3 | 1F10 | 2 |
| 3G6 | 1 | 3G6 | 1 | 3G6 |  |
| 3F2 | 1 | 3F2 |  | 3F2 | 1 |

# Supplementary figures

Figure S1**. Assessment of mESC dynamics with/without miR-10b: proliferation, senescence, and alkaline phosphatase activity analysed.** A) Cell proliferation assay. Data are representative of three independent experiments and values are expressed in mean ± SEM. B) Alkaline Phosphatase (AP) activity was used to assess the self-renewal capacity of mESCs. Scale bars: 100 μm. C) Cell senescence was analysed in cells with or without depleted miR-10b. miR-10b+/+ and miR-10b-/- stem cells were differentiated to mature adipocytes. At day 27, cells were stained for β-galactosidase and observed at ×20 magnification. For positive control, miR-10b-/- were treated with 500 µM H2O2 for 1 hour. Scale bar represents 100 µM. β-galactosidase-positive cells appear light blue.

Figure S2**. Transcriptomic analysis was conducted on mESCs differentiating to mature adipocytes at day 0, 12, and 27.** A) PCA plot for stem cells time course. B) Volcano plot illustrating the expression profile of genes in mESCs treated with gRNA targeting miR-10b or NTC vector at Day 0 (log2(FC) > 1 and p adjusted value > 0.05).


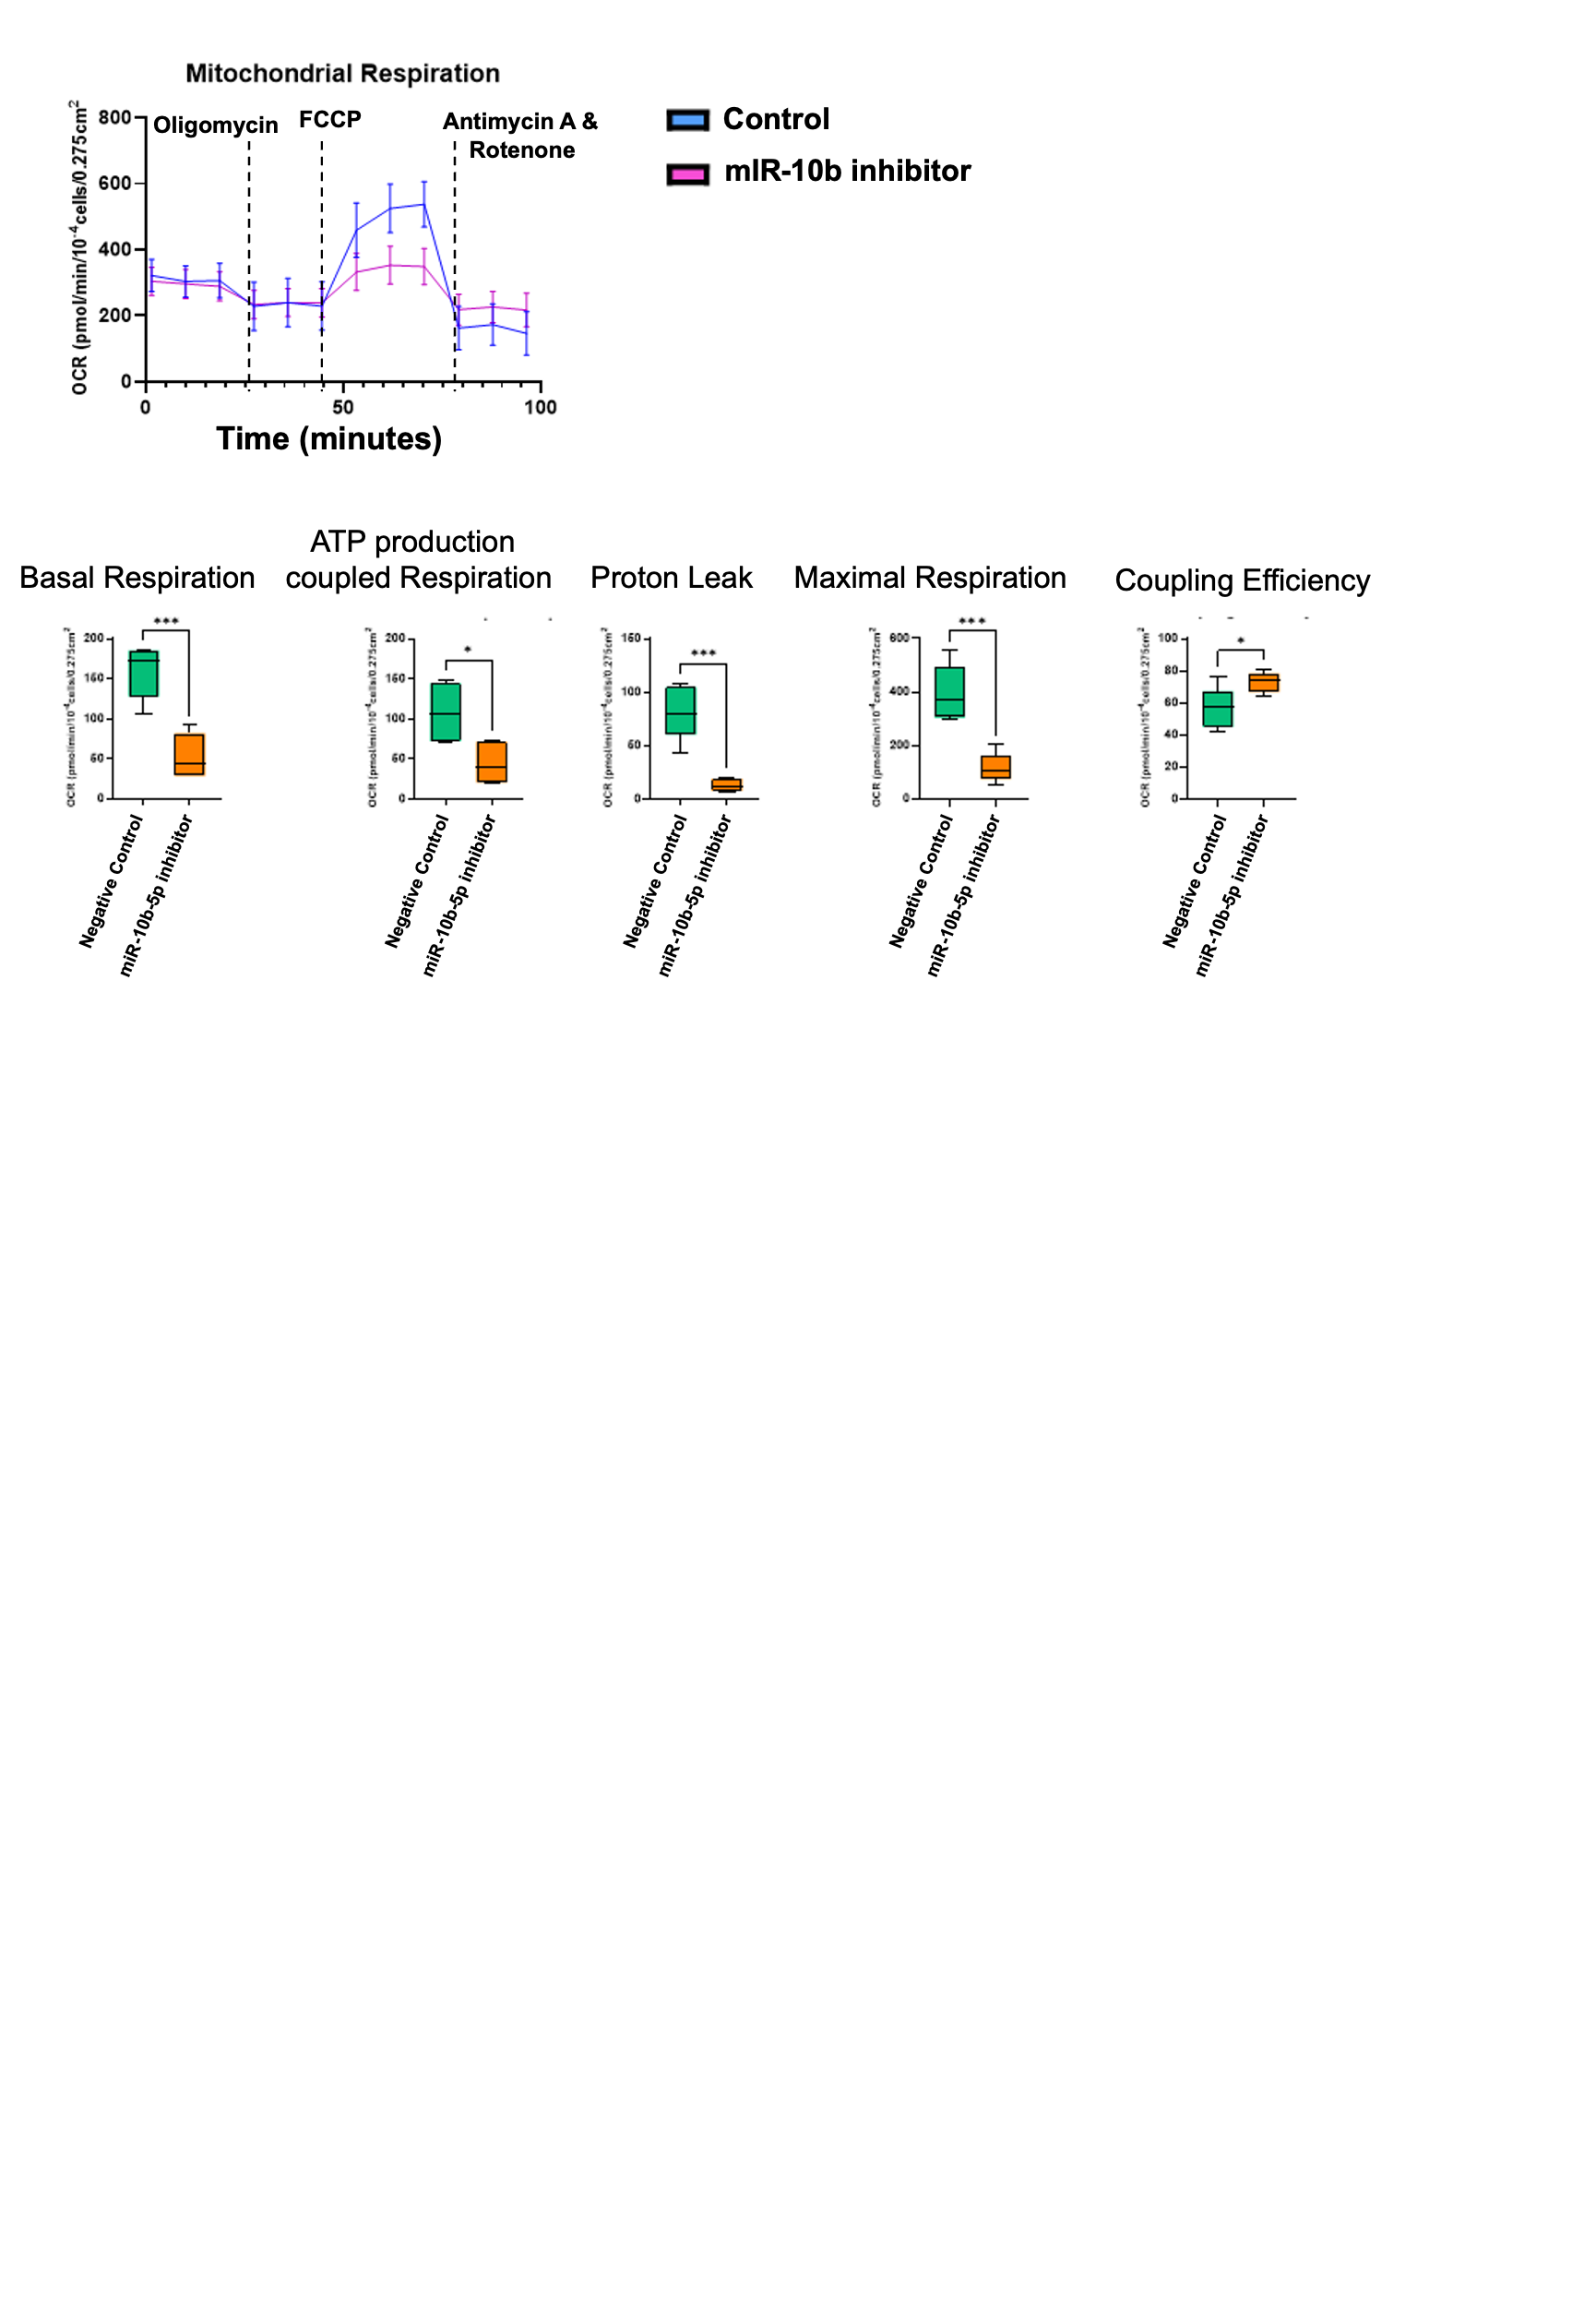


Figure S3**.** **Functional effects of miR-10b Inhibition on Bioenergetics.** Brown preadipocytes were differentiated to mature BA for 7 days and then transfected with miR-10b-5p inhibitor or negative control inhibitor. Extracellular acidification rate (ECAR) and oxygen consumption rate (OCR) were assessed 48 hours post-transfection (n ≥ 5). The blue line represents the negative control, while the pink line corresponds to the miR-10b-5p inhibitor. Box and whisker plots illustrate changes in mitochondrial respiration components in differentiated BA, including ATP production-coupled respiration, proton leak, and maximal respiratory capacity.


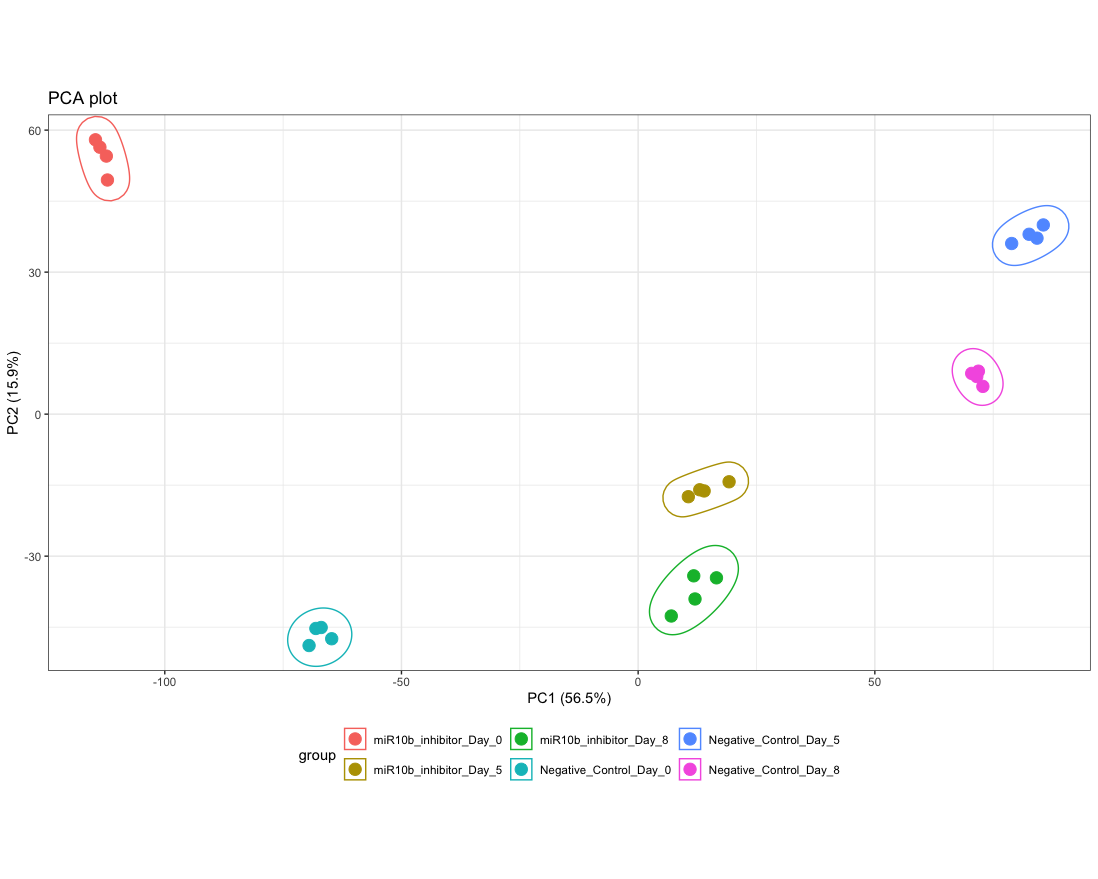

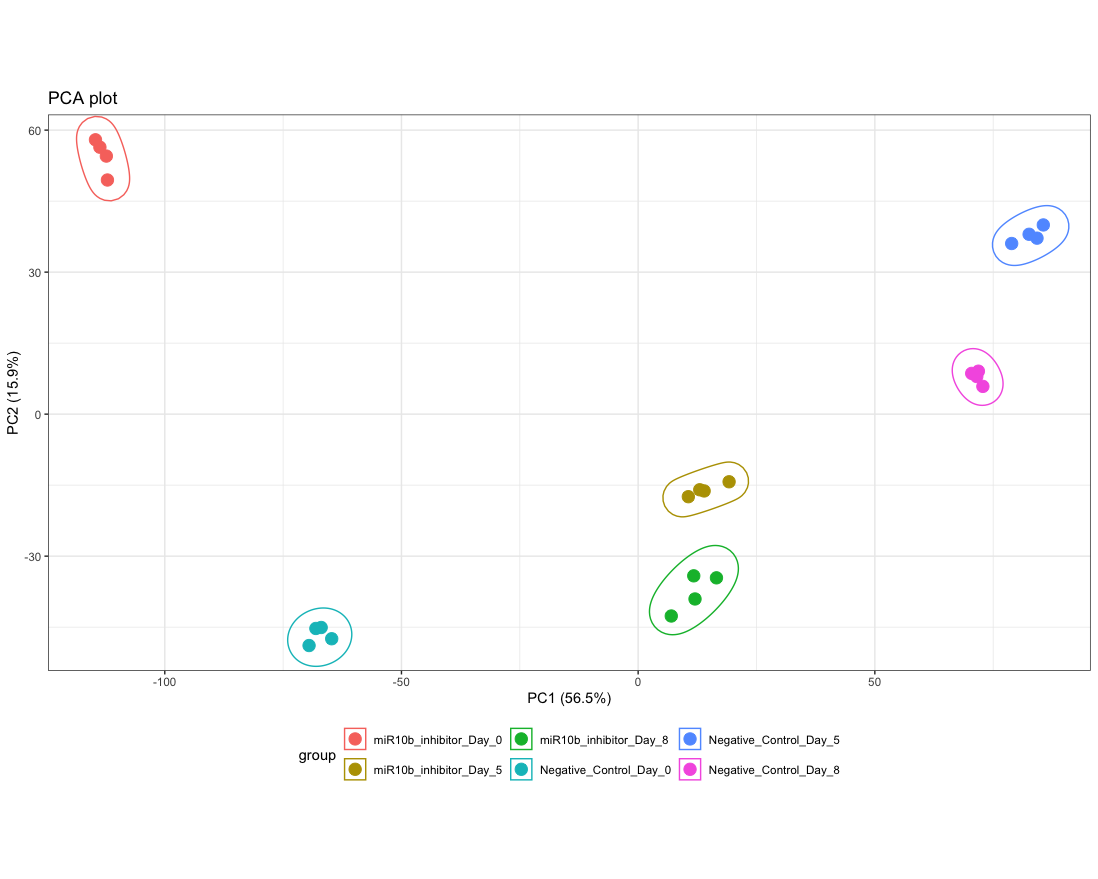


Figure S4**. PCA plot for BAT time course.**


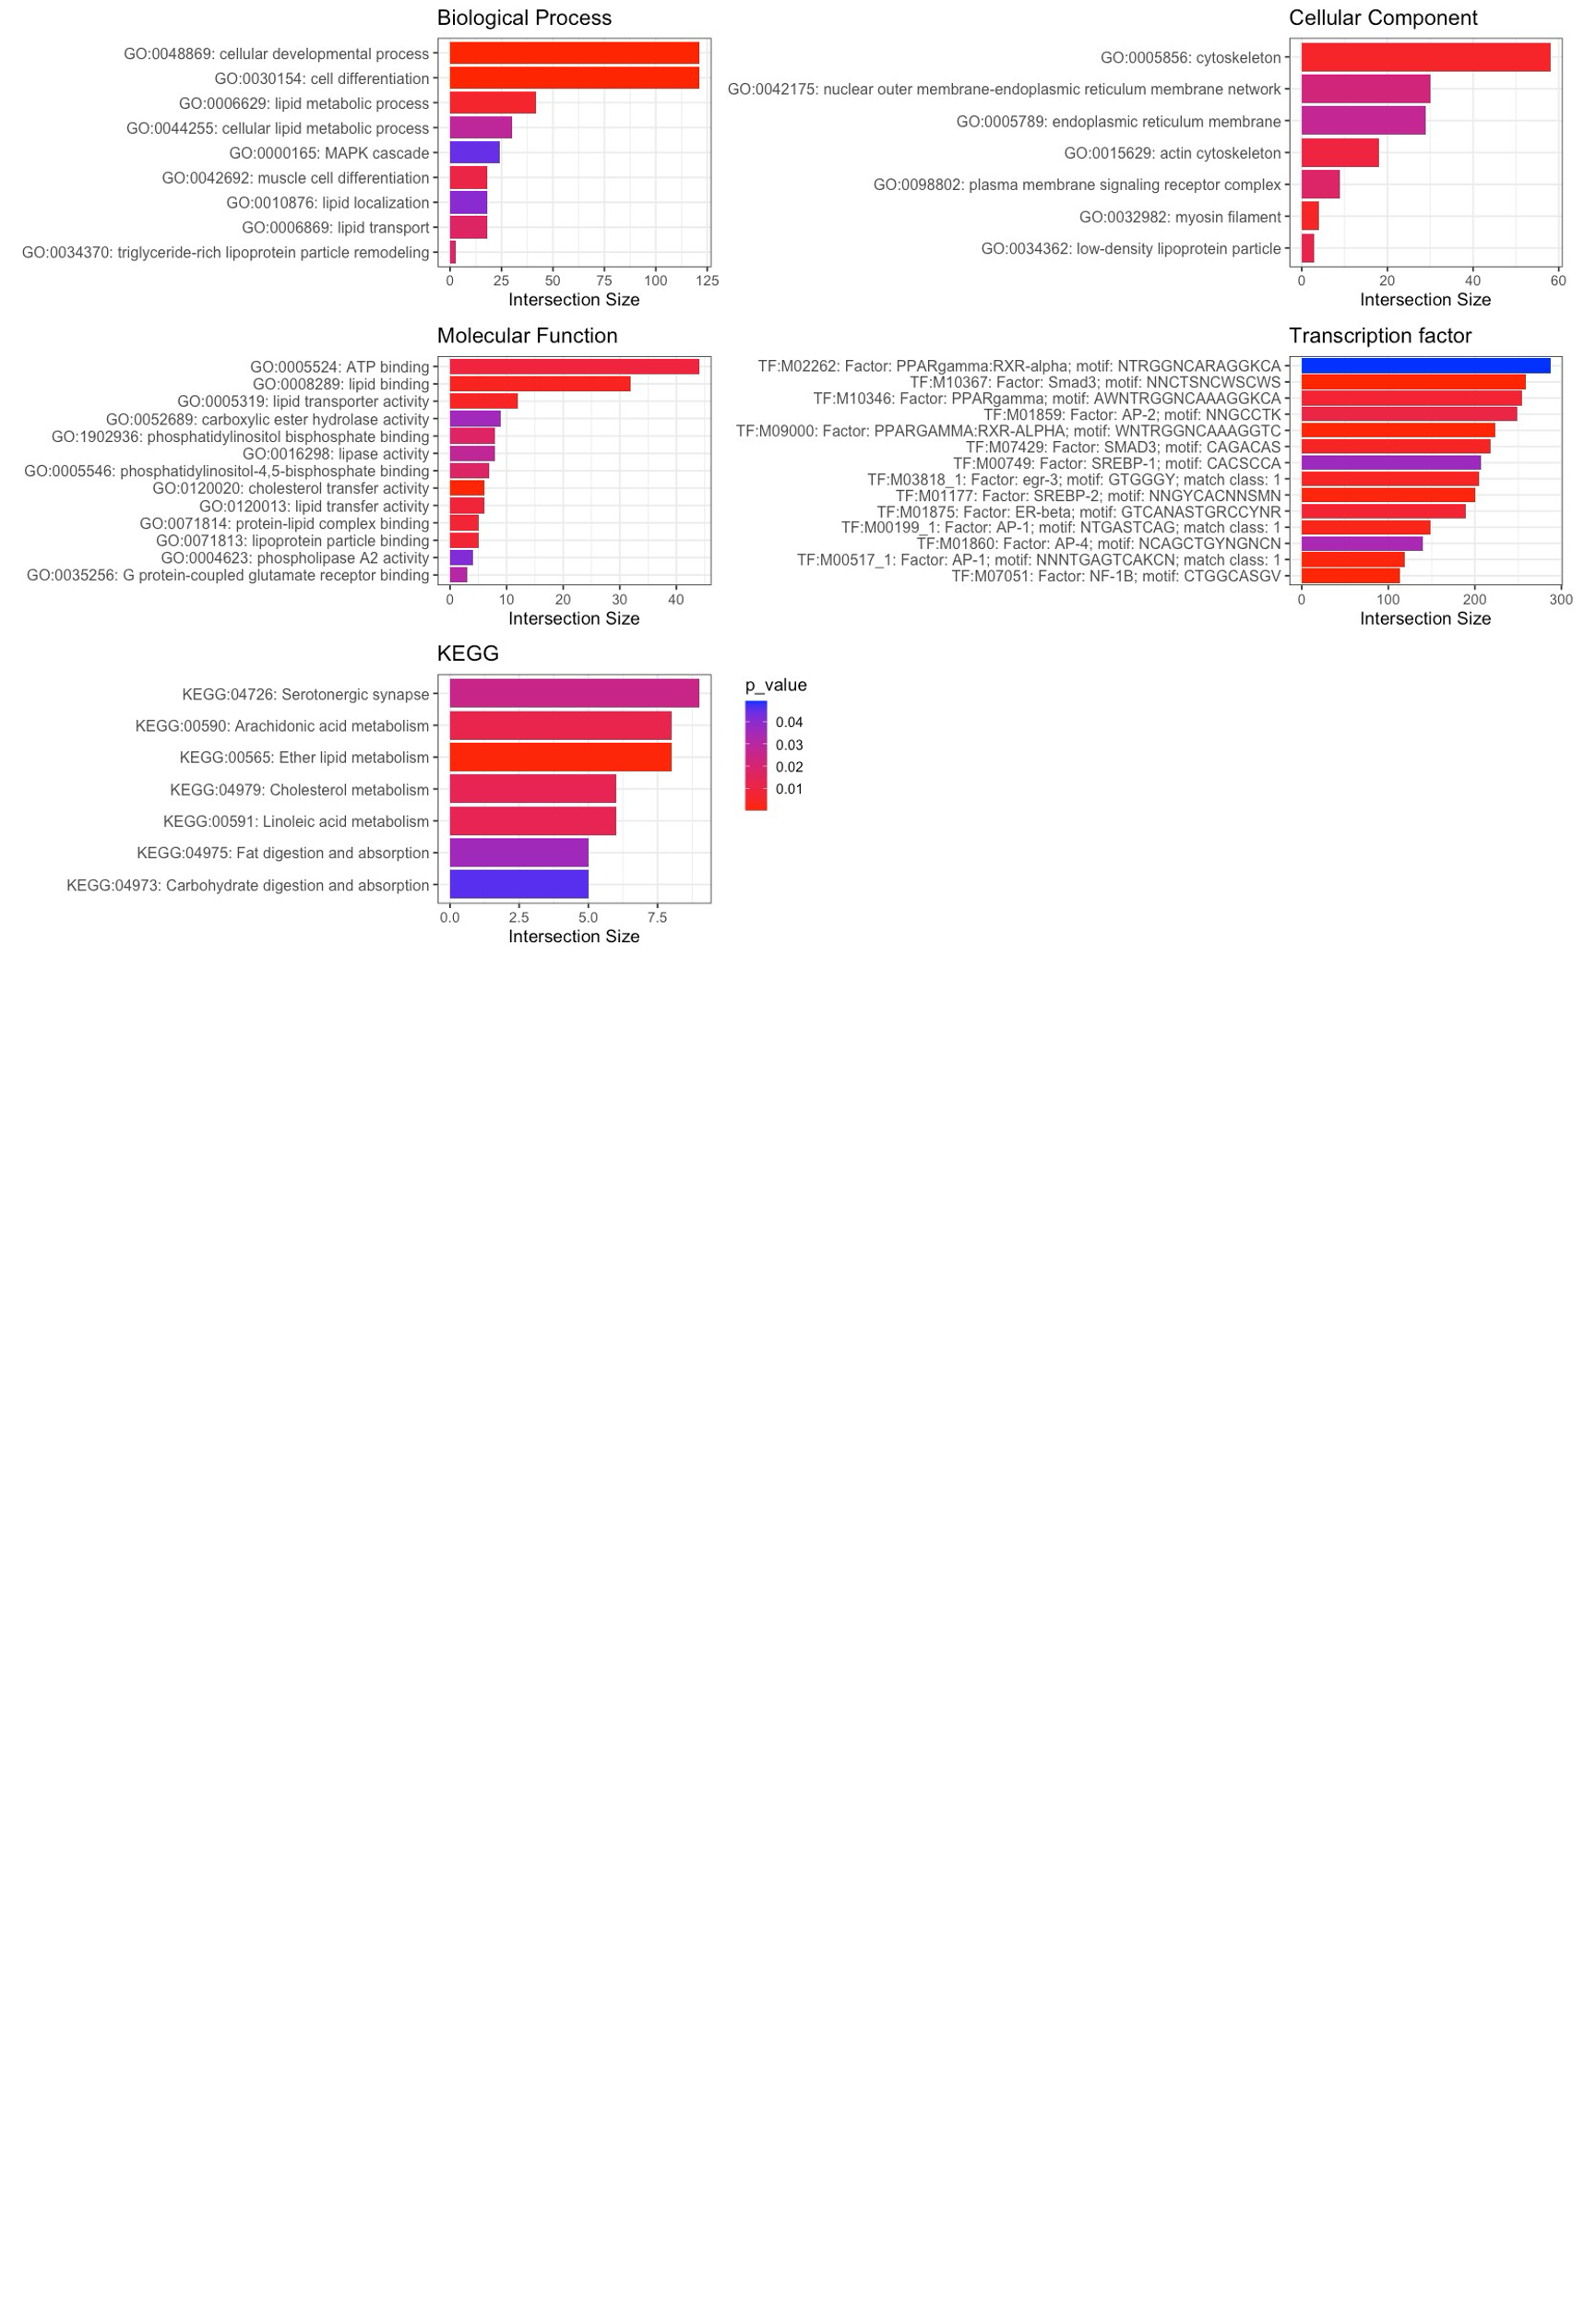


Figure S5**. Gene ontology (GO) enrichment analysis of related differentially expressed genes (DEGs) in purple module.**

Figure S6**. Dot plot of top 12 enriched pathways in DEGs from miR-10b-inhibited brown adipocytes, Day 0.** The count represents the number of inputted DEGs as a percentage of the total number of genes. The Benjamini p value for each molecular mechanism is shown.

Figure S7**. Dot plot showing top 12 enriched pathways in DEGs from miR-10b-inhibited brown adipocytes, Day 5.** Each dot represents the percentage of DEGs within the total number of genes. Additionally, the Benjamini-adjusted p-value for each molecular mechanism is presented.

Figure S8**. Dot plot showing top 12 enriched pathways in DEGs from miR-10b-inhibited brown adipocytes, Day 8.** The dots represent the percentage of DEGs within each pathway relative to the total number of genes in that category. Additionally, the Benjamini p-value for each pathway is displayed to indicate its statistical significance.

Figure S9**. Bright-Field Imaging of Lipid Droplet Formation on Day 6 of Adipocyte Differentiation.** Representative 4× magnification images show lipid droplet accumulation as an indicator of differentiation on Day 6. Scale bar: 500 µm (black).

Figure S10**. The effects of elevated miR-10b-5p levels on white adipogenesis.** A) White preadipocytes were treated with either negative control or miR-10b-5p mimic for 48 hours and differentiated for 8 days, followed by staining of their lipids using a GFP lipid stain and their nucleus with DAPI. Scale bar: 50 B) Lipid droplet quantification.

Figure S11**. Tubby immunostaining during WAT differentiation. Scale bar: 50 µm.**

Figure S12**. Gata6 expression during human and mouse brown adipocyte differentiation and across various adipose tissue depots.** A) Gata6 expression during human ESC differentiation to BA. Data (n ≥ 3) are shown as means + SEM (two-way ANOVA test, *p< 0.05, **p < 0.005, ***p < 0.0005, ****p < 0.0001). B) Gata6 expression during mouse BA differentiation. Data (n ≥ 3) are shown as means + SEM (two-way ANOVA test, ****p < 0.0001). C) Tub expression across different adipose tissue depots. D) TPM levels of Gata6 expression during mouse BA differentiation, as measured by RNA sequencing. Data (n ≥ 3) are shown as means + SEM (Kruskal-Wallis test, ns: not significant).
